# Supplementary material for: Photosensitization of 2′-deoxyadenosine-5′-monophosphate by pterin
Source: Royal Society of Chemistry journal article supplement (doi:10.1039/b707312g), 2007-01-01
Supplement: b707312g(1).pdf [file b707312g%281%29.pdf]

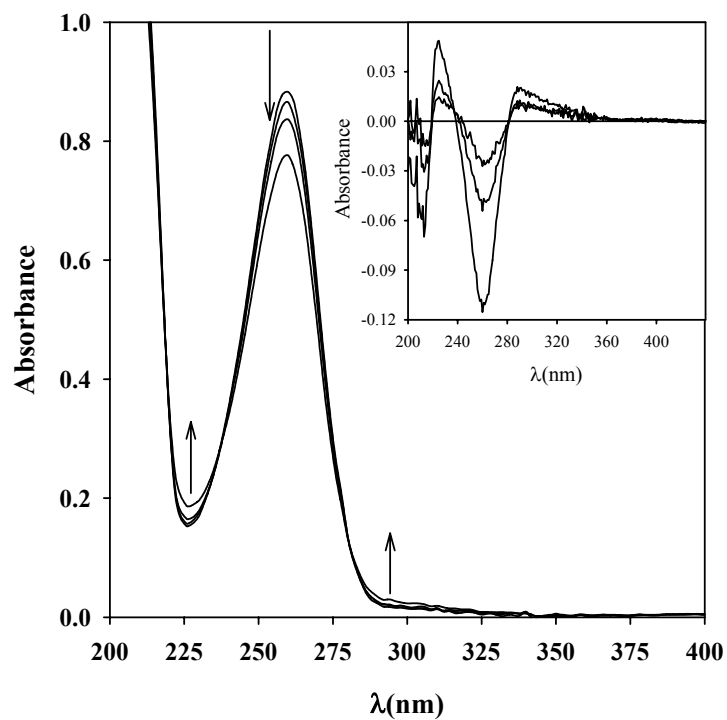

**Figure S1.**

Evolution of the absorption spectra of air-equilibrated solutions of dAMP ( $300 \mu\text{M}$ ) irradiated in the presence of pterin ( $50 \mu\text{M}$ ), as a function of irradiation time (0, 15, 30 and 60 min). In this Figure, the spectrum of a pterin solution was subtracted to the experimental spectra recorded at the different times (pH = 5.5; arrows indicate the changes observed at different wavelengths). Inset: Experimental-difference spectra.
