# Supplementary figures and images for: Photosensitization of 2′-deoxyadenosine-5′-monophosphate by pterin
Source: Royal Society of Chemistry journal article supplement (doi:10.1039/b707312g), 2007-01-01

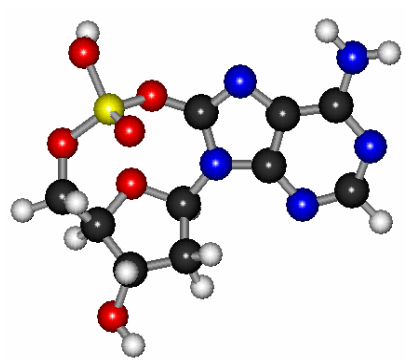

**Scheme S1.**

Geometry of product P2 (M=329) obtained by semiempirical AM1 calculations.

Supplement: b707312g(2).pdf [file b707312g%282%29.pdf]
